# Supplementary material for: Optimal stratification in outcome prediction using baseline information
Source: Oxford University Press journal article supplement (doi:10.1093/biomet/asw049), 2016-09-29
Supplement: asw049_supp.zip [file asw049_supp.zip]

Archive with 2 entries (2 files):
- Figure2new.pdf
- Supplementary Material-revision-round3.pdf
