# Supplementary figures and images for: Optimal stratification in outcome prediction using baseline information
Source: Oxford University Press journal article supplement (doi:10.1093/biomet/asw049), 2016-09-29

Event-free probability

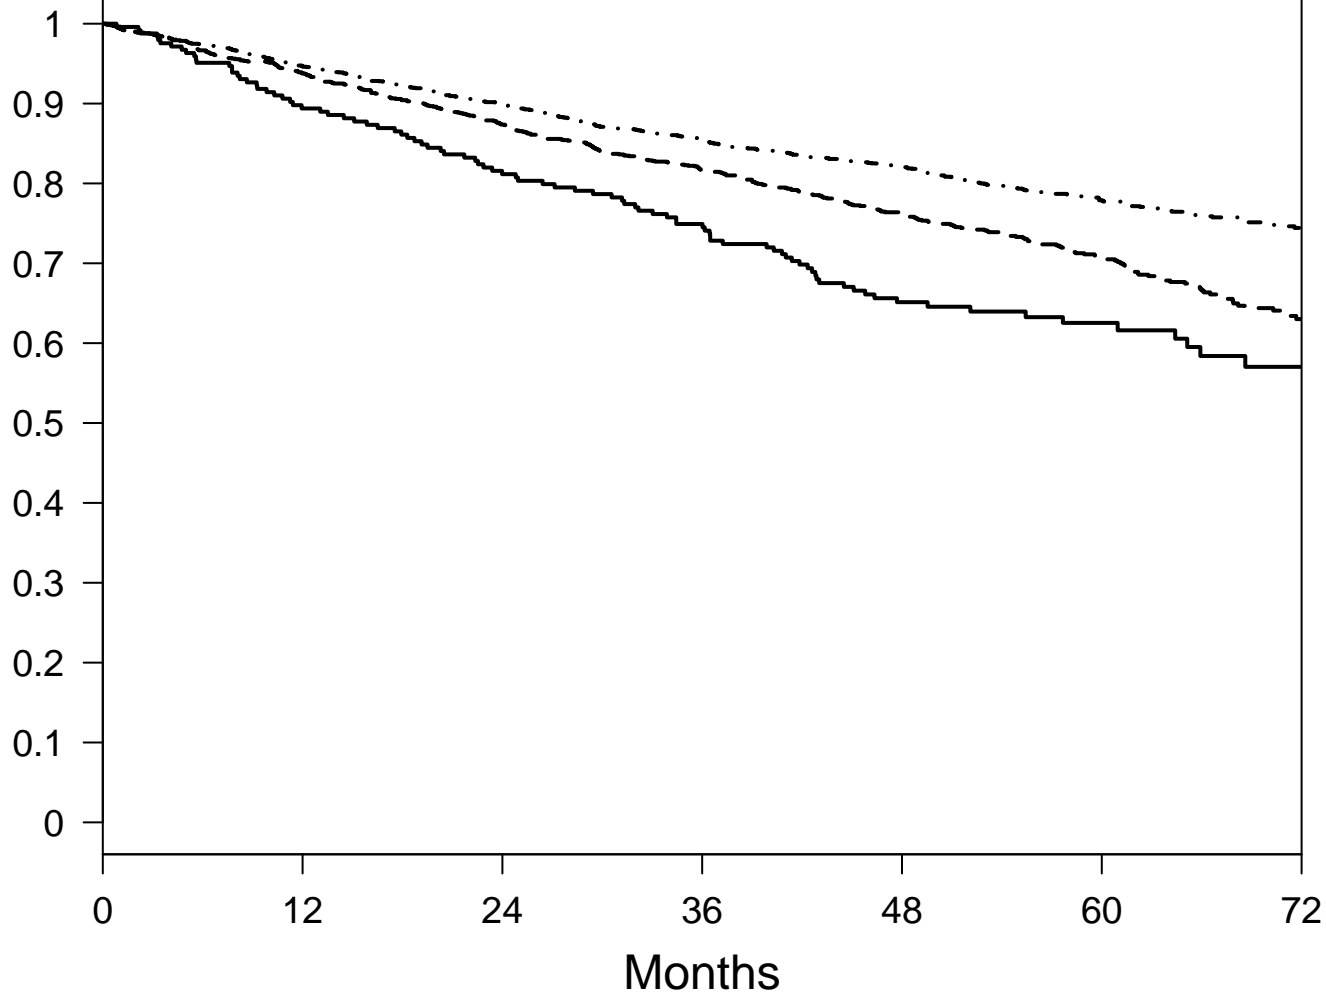

Supplement: asw049_supp.zip [file asw049_supp.zip › Figure2new.pdf]
